# Supplementary material
Source: publisher figshare collection journal article supplement (https://gsajournals.figshare.com/ndownloader/files/26016656)
Supplement: Supplementary file 1 [file 26016656]

## Sheet: table S7
Table S7. C. Sulstoni GFP::lin-41 allele generated by CRISPR/Cas9 editing.
Allele name	crRNA	Mutation
ma513	cr39	CSP32.scaffold00176: 35802<ccgaaacaaaggaaa[aatgagtaaaggagaagaacttttcactggagttgtcccaattcttgttgaattagatggtgatgttaatgggcacaaattttctgtcagtggagagggtgaaggtgatgcaacatacggaaaacttacccttaaatttatttgcactactggaaaactacctgttccatgggtaagtttaaacatatatatactaactaaccctgattatttaaattttcagccaacacttgtcactactttctgttatggtgttcaatgcttctcgagatacccagatcatatgaaacggcatgactttttcaagagtgccatgcccgaaggttatgtacaggaaagaactatatttttcaaag…
		nucleotide position # <flanking genomic sequence [inserted sequence] flanking genomic sequence> nucleotide position #
